# Supplementary material
Source: MDPI journal article supplement (https://www.mdpi.com/2073-4344/11/10/1151)
Supplement: s1 [file s1]

# **CuO-In<sub>2</sub>O<sub>3</sub> Catalysts Supported on Halloysite Nanotubes for CO<sub>2</sub> Hydrogenation to Dimethyl Ether**

**Alexey Pechenkin<sup>1,2,\*</sup>, Dmitry Potemkin<sup>2,3</sup>, Maria Rubtsova<sup>1</sup>, Pavel Snytnikov<sup>2</sup>, Pavel Plyusnin<sup>4</sup> and Aleksandr Glotov<sup>1</sup>**

<sup>1</sup> Department of Physical and Colloid Chemistry, Faculty of Chemical Technology and Ecology, Gubkin Russian State University of Oil and Gas, 65 Leninsky prosp., 119991 Moscow, Russia; pechenkin@catalysis.ru (A.P.); artemovamai@gmail.com (M.R.); glotov.a@gubkin.ru (A.G.)

<sup>2</sup> Boreskov Institute of Catalysis, Pr. Akademika Lavrentieva, 5, 630090, Novosibirsk, Russia; potema@catalysis.ru (D.P.), pvsnyt@catalysis.ru (P.S.)

<sup>3</sup> Department of Environmental Engineering, Novosibirsk State Technical University, Karl Marx Pr., 20, 630073, Novosibirsk, Russia.

<sup>4</sup> Nikolaev Institute of Inorganic Chemistry, Siberian Branch of the Russian Academy of Science, Novosibirsk 630090, Russia; plus@niic.nsc.ru.

\* Correspondence: pechenkin@catalysis.ru

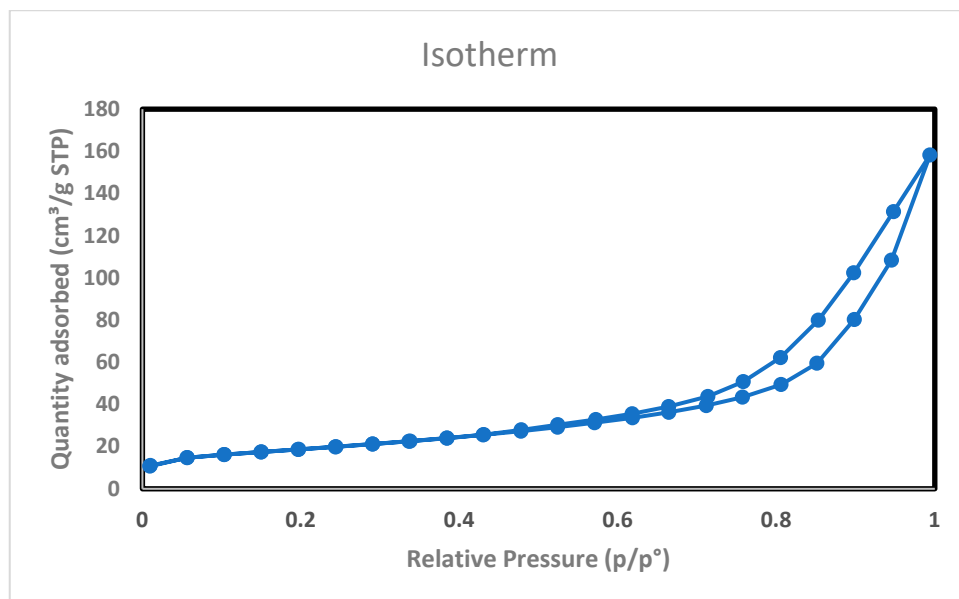

(A)

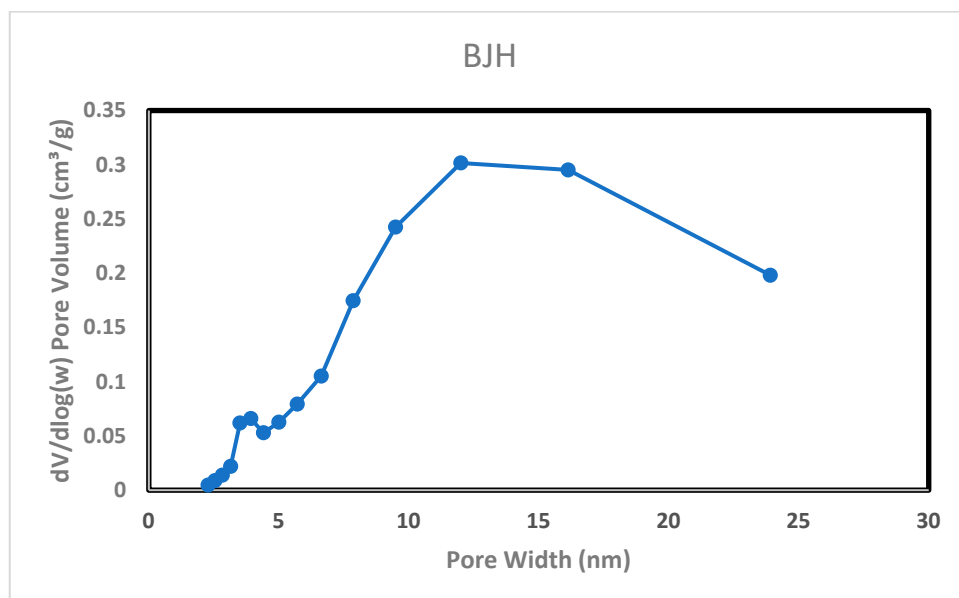

(B)

Figure S1. Nitrogen adsorption/desorption isotherms (A) and pore size distribution (B) of  $\text{CuO-In}_2\text{O}_3/\text{HNT}$  catalyst.

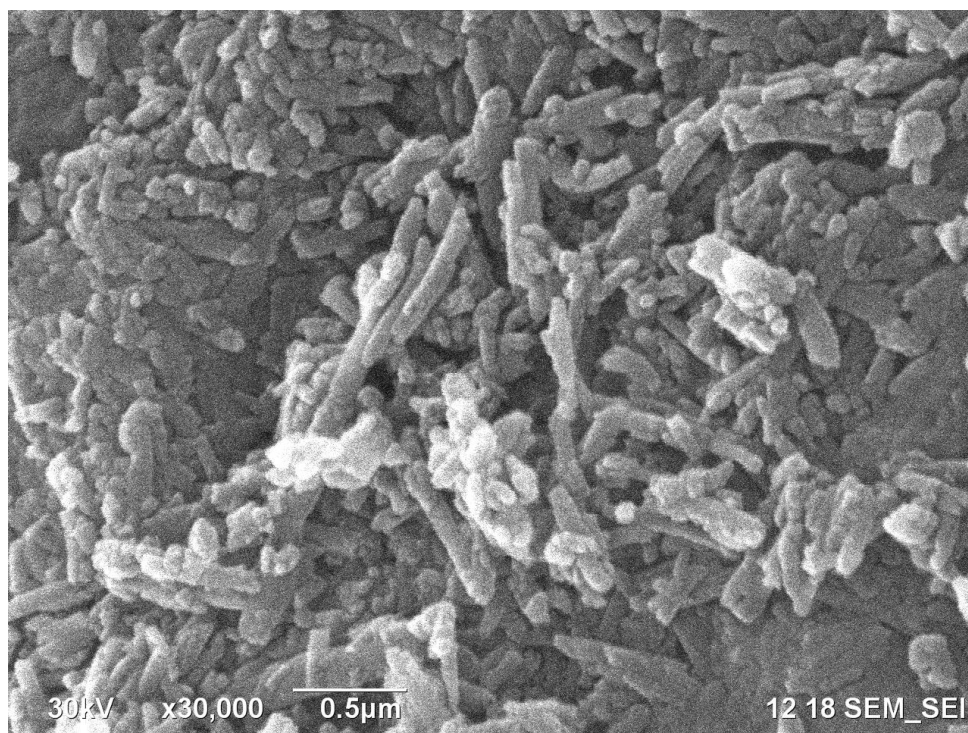

Figure. S2. SEM image of HNT.

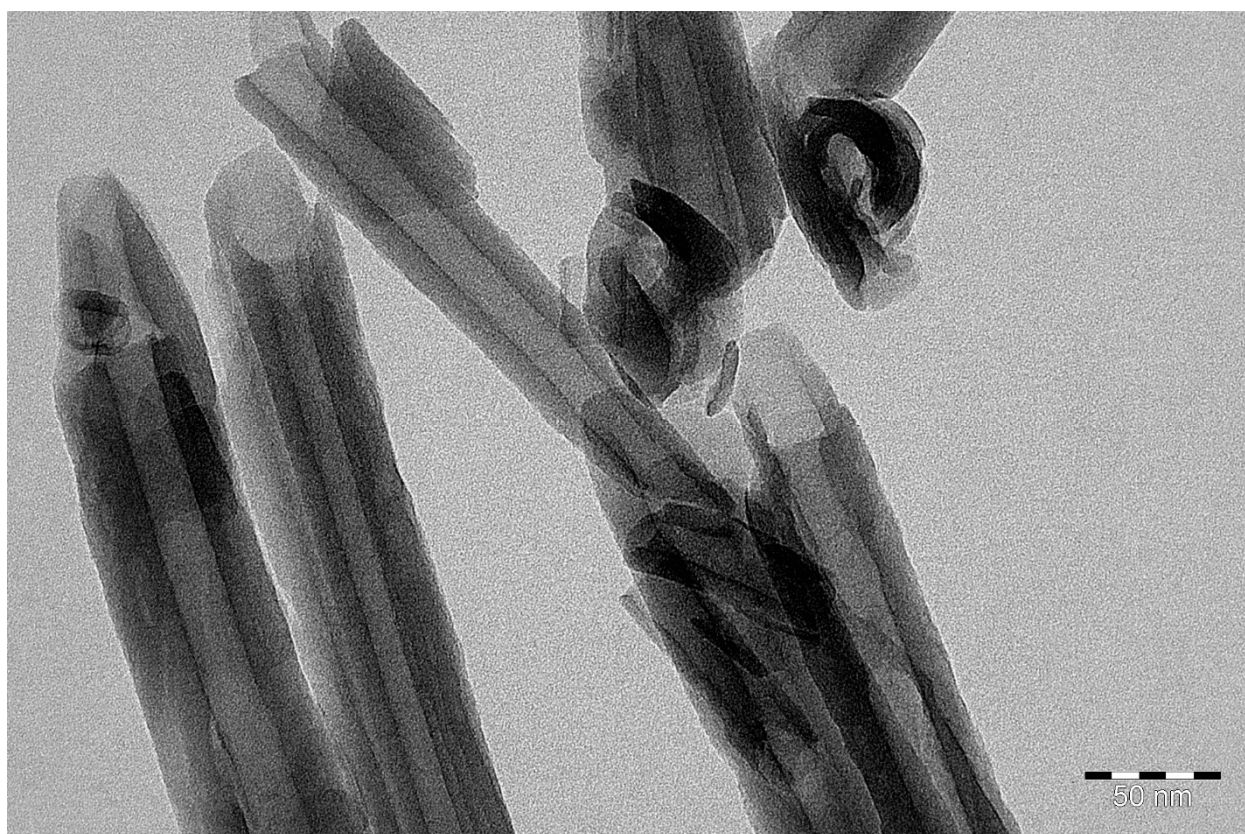

Figure. S3. TEM image of HNT.
